# Supplementary material for: Immobilized bis-layered ionic liquids/peroxotungstates as an efficient catalyst for selective oxidation of alcohols in neat water
Source: Royal Society of Chemistry journal article supplement (doi:10.1039/c6nj01476c), 2016-01-01
Supplement: c6nj01476c1.pdf [file c6nj01476c1.pdf]

## **Immobilized bis-layered ionic liquids/peroxotungstates as an efficient catalyst for selective oxidation of alcohols in neat water**

Juan Fan, Fan Pu, Man Sun, Zhong-Wen Liu, Xiao-Yan Han, Jun-Fa Wei and Xian-Ying Shi\*

Key Laboratory for Macromolecular Science of Shaanxi Province, School of Chemistry and Chemical Engineering, Shaanxi Normal University, Xi'an 710062, China.

**Corresponding e-mail:** shixy@snnu.edu.cn.

### **List of contents**

**Fig. S1** IR spectra of the catalyst and its precursors.

**Fig. S2** The TGA curves of SiO<sub>2</sub>-BisILs[Cl] (a), SiO<sub>2</sub>-BisILs[PF<sub>6</sub>] (b), and SiO<sub>2</sub>-BisILs[W<sub>2</sub>O<sub>3</sub>(O<sub>2</sub>)<sub>4</sub>] (c).

**Fig. S3** SEM image and EDAX results of the SiO<sub>2</sub>-BisILs[PF<sub>6</sub>].

**Fig. 4S** SEM image and EDAX results of the SiO<sub>2</sub>-BisILs[W<sub>2</sub>O<sub>3</sub>(O<sub>2</sub>)<sub>4</sub>].

**Fig. 5S** IR spectra of the fresh and used SiO<sub>2</sub>-BisILs[W<sub>2</sub>O<sub>3</sub>(O<sub>2</sub>)<sub>4</sub>].

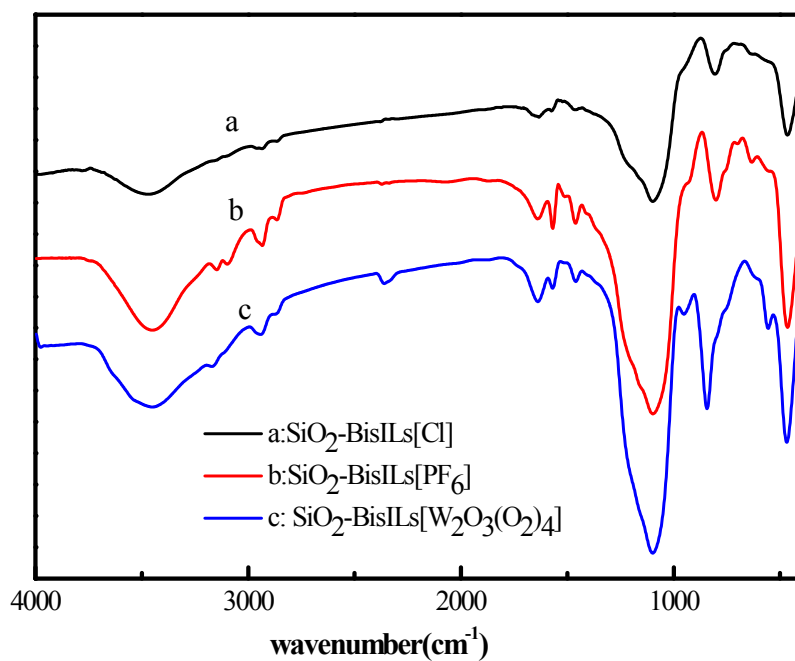

**Fig. S1** IR spectra of the catalyst and its precursors.

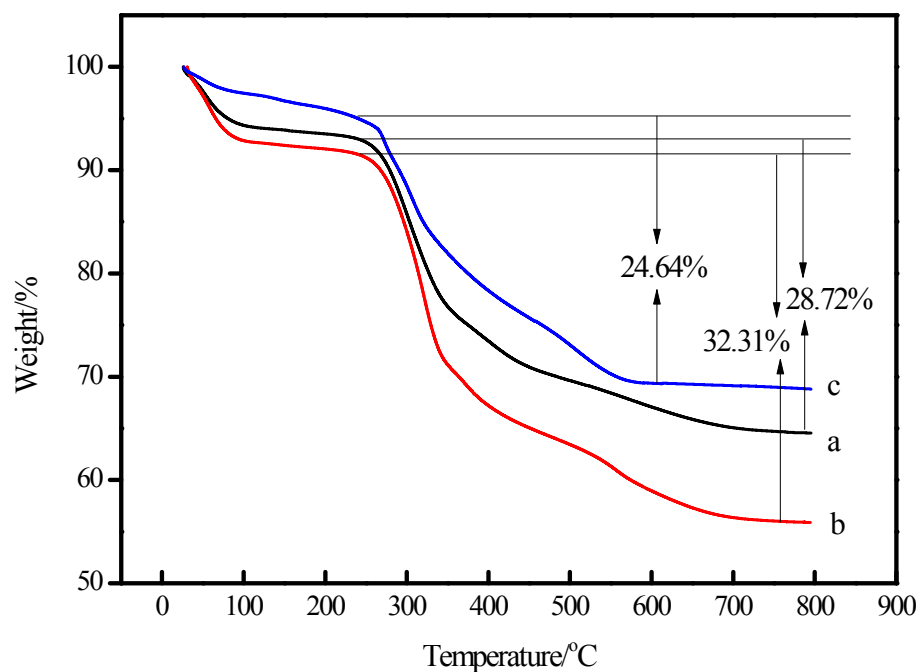

**Fig. S2** The TGA curves of SiO<sub>2</sub>-BisILs[Cl] (a), SiO<sub>2</sub>-BisILs[PF<sub>6</sub>] (b), and SiO<sub>2</sub>-BisILs[W<sub>2</sub>O<sub>3</sub>(O<sub>2</sub>)<sub>4</sub>] (c).

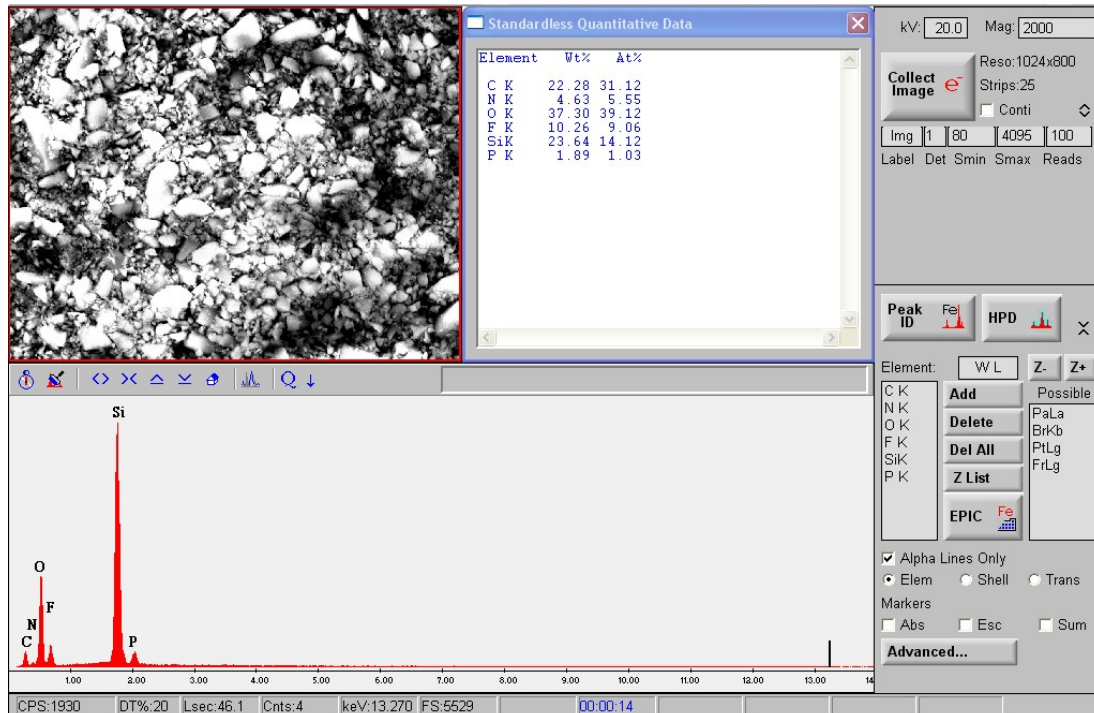

Fig. S3 SEM image and EDAX results of the SiO<sub>2</sub>-BisILs[PF<sub>6</sub>].

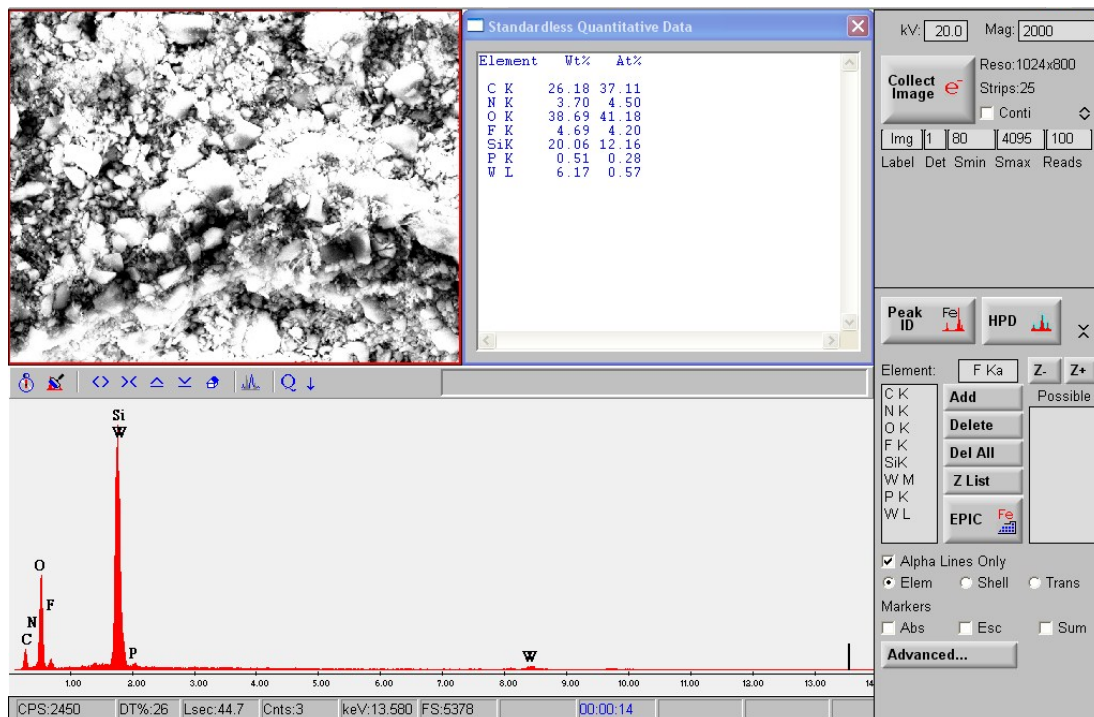

Fig. 4S SEM image and EDAX results of the SiO<sub>2</sub>-BisILs[W<sub>2</sub>O<sub>3</sub>(O<sub>2</sub>)<sub>4</sub>].

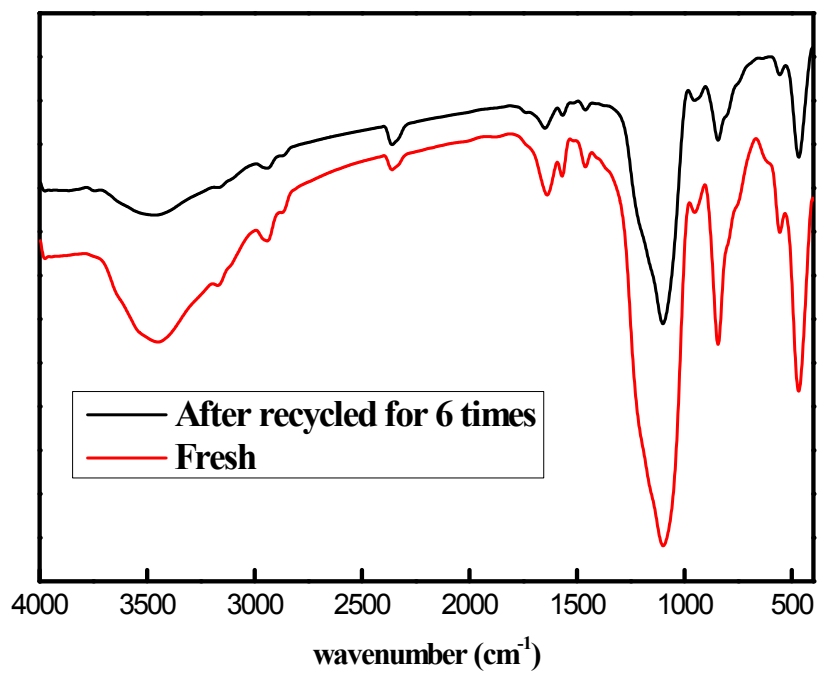

**Fig. 5S** IR spectra of the fresh and used SiO<sub>2</sub>-BisILs[W<sub>2</sub>O<sub>3</sub>(O<sub>2</sub>)<sub>4</sub>].
